# Supplementary material
Source: MDPI journal article supplement (https://www.mdpi.com/2073-4352/13/2/178)
Supplement: s1 [file s1]

## Supplemental Material

### Effect of Bi<sup>3+</sup>-doping on the electronic structure and thermoelectric properties of (Sr<sub>0.889-x</sub>La<sub>0.111</sub>Bi<sub>x</sub>)TiO<sub>2.963</sub> : First-principles calculations

Lingyun Gong<sup>1</sup>, Ping Zhang<sup>1</sup>, Zhihao Lou<sup>1</sup>, Ziyao Wei<sup>1</sup>, Zhuozhao Wu<sup>2</sup>, Jie Xu<sup>1</sup>,  
Xuanjie Chen<sup>2</sup>, Weihang Xu<sup>2</sup>, Yiqi Wang<sup>2</sup>, Feng Gao<sup>1\*</sup>

*1 State Key Laboratory of Solidification Processing, MIIT Key Laboratory of Radiation Detection Materials and Devices, NPU-QMUL Joint Research Institute of Advanced Materials and Structure, USI Institute of Intelligence Materials and Structure, School of Materials Science and Engineering, Northwestern Polytechnical University, Xi'an, 710072, China*

*2 Queen Mary University of London Engineering School, Northwestern Polytechnical University, Xi'an, 710072, China*

*\*Corresponding author. Feng Gao, Email: gaofeng@nwpu.edu.cn*

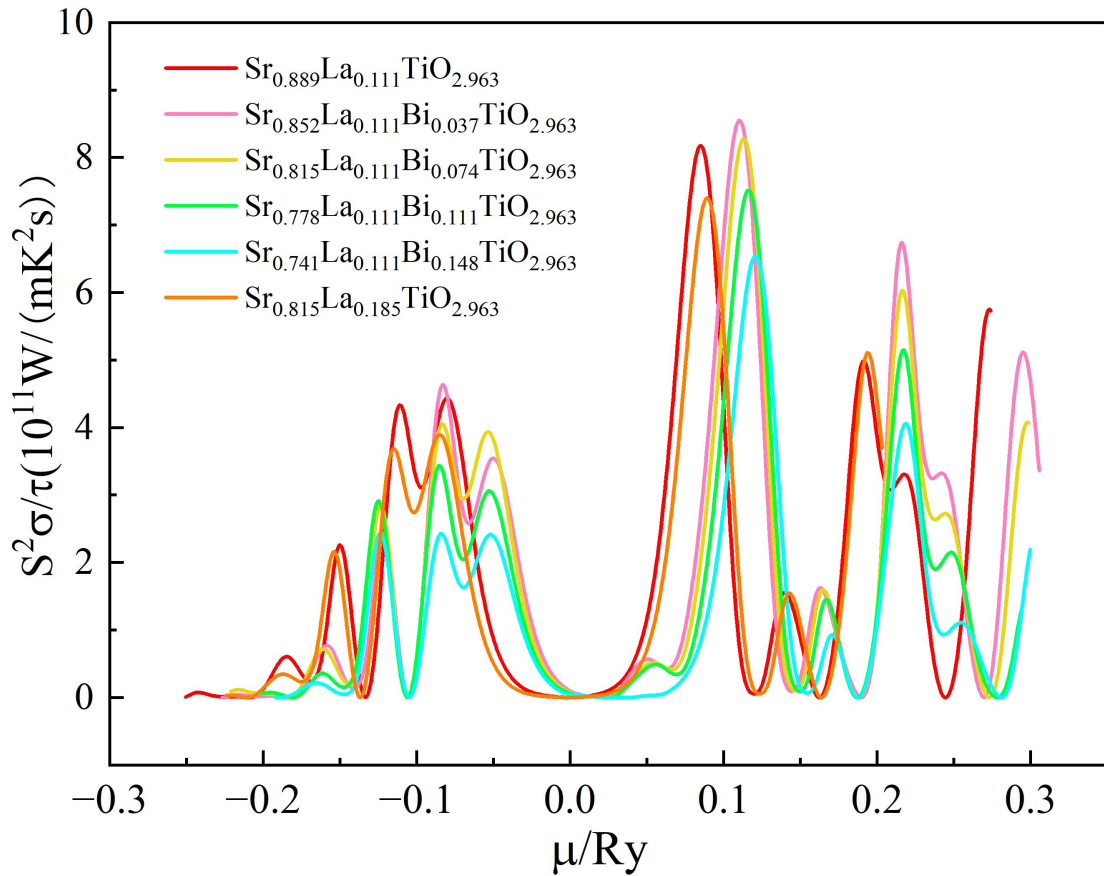

Figure S1. Chemical potential dependent of  $S^2\sigma/\tau$  for (Sr<sub>0.889-x</sub>La<sub>0.111</sub>Bi<sub>x</sub>)TiO<sub>2.963</sub> at 1200K

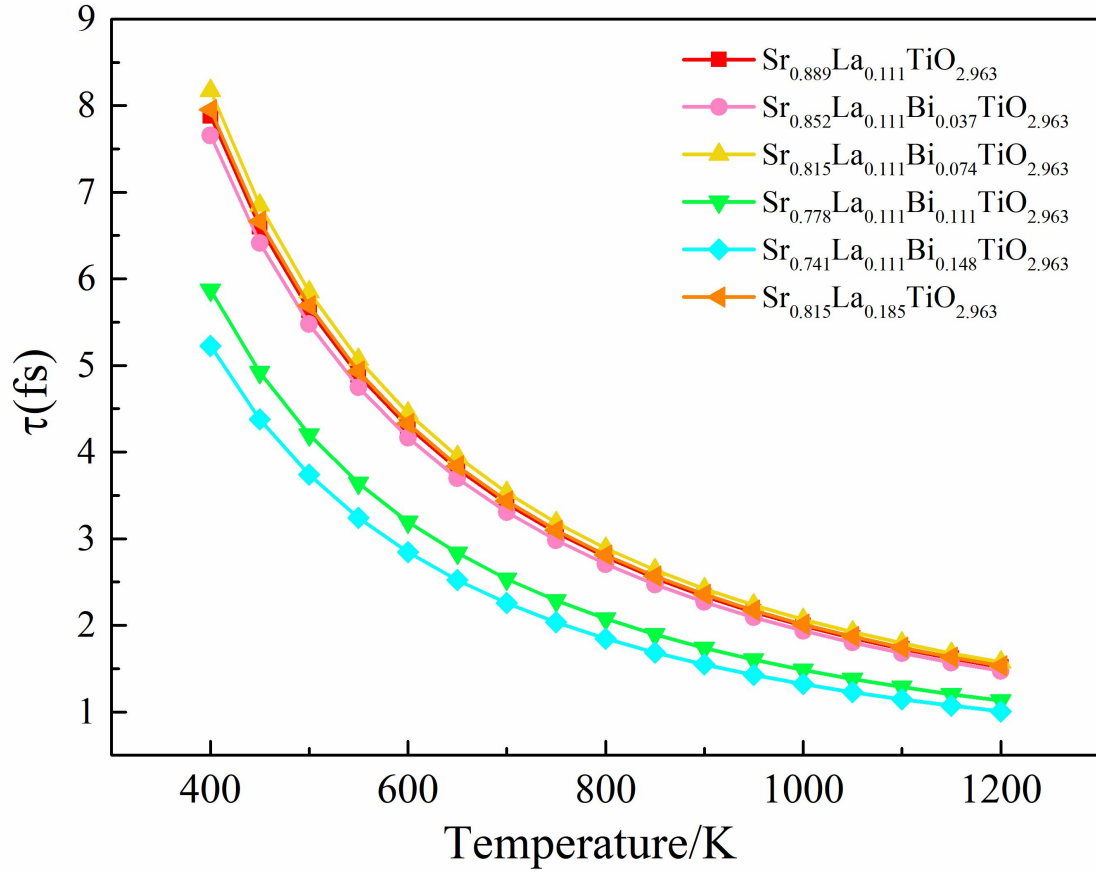

Figure S2. Temperature dependent of  $\tau$  for  $(\text{Sr}_{0.889-x}\text{La}_{0.111}\text{Bi}_x)\text{TiO}_{2.963}$

Table S1 Mechanical properties of  $(\text{Sr}_{0.889-x}\text{La}_{0.111}\text{Bi}_x)\text{TiO}_{2.963}$

| Crystals                                                                | Young's modulus | Poisson's                  | Debye temperature |
|-------------------------------------------------------------------------|-----------------|----------------------------|-------------------|
|                                                                         | $E(\text{GPa})$ | ratio $\sigma(\text{m/s})$ | $\Theta_D$        |
| $\text{Sr}_{0.889}\text{La}_{0.111}\text{TiO}_{2.963}$                  | 265.7           | 0.252                      | 648.9             |
| $\text{Sr}_{0.852}\text{La}_{0.111}\text{Bi}_{0.037}\text{TiO}_{2.963}$ | 288.2           | 0.218                      | 674.8             |
| $\text{Sr}_{0.815}\text{La}_{0.111}\text{Bi}_{0.074}\text{TiO}_{2.963}$ | 269.9           | 0.243                      | 641.9             |
| $\text{Sr}_{0.778}\text{La}_{0.111}\text{Bi}_{0.111}\text{TiO}_{2.963}$ | 258.7           | 0.245                      | 620.7             |
| $\text{Sr}_{0.741}\text{La}_{0.111}\text{Bi}_{0.148}\text{TiO}_{2.963}$ | 268.2           | 0.234                      | 626.8             |
| $\text{Sr}_{0.815}\text{La}_{0.185}\text{TiO}_{2.963}$                  | 272.8           | 0.246                      | 652.4             |

Slack derived the quantitative expression of intrinsic lattice thermal conductivity<sup>[1]</sup>:

$$k_{\text{Slack}} = A \frac{M \Theta_D^3 \delta}{\gamma^2 n^{2/3} T} \quad (1)$$

where  $A$  is constant,  $A = 3.04 \times 10^7 \text{ W} \cdot \text{mol/kg/m}^2/\text{K}^3$ ,  $M$  is the average atomic mass,  $n$  is the number of atoms in primitive cell, the  $\delta^3$  is average atomic volume,  $\gamma$  is Gruneisen parameters, which can be calculated by poisson's ratio  $\sigma$ <sup>[2]</sup>,  $\Theta_D$  is the Debye temperature. Poisson's ratio  $\sigma$  and  $\Theta_D$  can be calculated by the elastic properties of first principles. The detailed data can be seen in Table S1. Parameters of the calculated Slack model are shown in Table S2.

Due to the scattering of acoustic phonons with the increase of temperature, the relationship between thermal conductivity and temperature in the experiment is often as follows:  $\kappa = A/T + L \sigma T$ , where  $A/T$  and  $L \sigma T$  are respectively the lattice thermal conductivity and the electronic thermal conductivity<sup>[3]</sup>.

At present, researchers have conducted a lot of research on the lattice thermal conductivity of  $\text{La}^{3+}$  doped  $\text{SrTiO}_3$  materials in the experiment<sup>[4-11]</sup>. In the experiment, the lattice thermal conductivity of  $\text{Sr}_{0.9}\text{La}_{0.1}\text{TiO}_3$  at 1073K is within the trend range of 2.0-2.6W/m·K. The relationship between the lattice thermal conductivity and temperature of  $\text{Sr}_{0.9}\text{La}_{0.1}\text{TiO}_3$  fitted by the experiment is obtained as:  $\kappa = 2860.0/T$ . Since the material in the experiment often have oxygen vacancies, we used the  $(\text{Sr}_{1-x}\text{La}_x)\text{TiO}_{2.963}$  cell model to fit the experimental data. In this paper, the relation between the lattice thermal conductivity of  $(\text{Sr}_{1-x}\text{La}_x)\text{TiO}_{2.963}$  and temperature calculated by Slack model is  $\kappa = 9475.4/T$ , as shown in Table S2. The fitting parameter  $n=3.31$  is obtained by dividing these two relationships. Then the lattice thermal conductivity models of  $\text{Sr}_{0.852}\text{La}_{0.111}\text{Bi}_{0.037}\text{TiO}_{2.963}$ ,  $\text{Sr}_{0.815}\text{La}_{0.111}\text{Bi}_{0.074}\text{TiO}_{2.963}$ ,  $\text{Sr}_{0.778}\text{La}_{0.111}\text{Bi}_{0.111}\text{TiO}_{2.963}$ ,  $\text{Sr}_{0.741}\text{La}_{0.111}\text{Bi}_{0.148}\text{TiO}_{2.963}$ ,  $\text{Sr}_{0.889}\text{La}_{0.111}\text{TiO}_{2.963}$ ,  $\text{Sr}_{0.815}\text{La}_{0.185}\text{TiO}_{2.963}$  calculated according to Slack model are divided by  $n$ . Finally, the lattice thermal conductivity changes with temperature is shown in Figure 8(e).

Table S2 Thermal properties of (Sr<sub>0.889-x</sub>La<sub>0.111</sub>Bi<sub>x</sub>)TiO<sub>2.963</sub>

| Crystals                                                                         | $\bar{M}$ (g/mol) | $\delta^3$ (Å <sup>3</sup> ) | $\delta$ (Å) | $\gamma$ | $\kappa_{\text{Slack}}$ | $\kappa_{\text{Slack}}/n$ |
|----------------------------------------------------------------------------------|-------------------|------------------------------|--------------|----------|-------------------------|---------------------------|
| Sr <sub>0.889</sub> La <sub>0.111</sub> TiO <sub>2.963</sub>                     | 37.999            | 8.385                        | 2.032        | 1.510    | 9475.4/T                | 2860.0/T                  |
| Sr <sub>0.852</sub> La <sub>0.111</sub> Bi <sub>0.037</sub> TiO <sub>2.963</sub> | 38.905            | 8.367                        | 2.030        | 1.357    | 13763.3/T               | 4159.7/T                  |
| Sr <sub>0.815</sub> La <sub>0.111</sub> Bi <sub>0.074</sub> TiO <sub>2.963</sub> | 39.811            | 8.350                        | 2.029        | 1.471    | 10301.4/T               | 3112.2/T                  |
| Sr <sub>0.778</sub> La <sub>0.111</sub> Bi <sub>0.111</sub> TiO <sub>2.963</sub> | 40.716            | 8.333                        | 2.027        | 1.476    | 9466.1/T                | 2859.8/T                  |
| Sr <sub>0.741</sub> La <sub>0.111</sub> Bi <sub>0.148</sub> TiO <sub>2.963</sub> | 41.622            | 8.315                        | 2.026        | 1.426    | 10669.2/T               | 3223.3/T                  |
| Sr <sub>0.815</sub> La <sub>0.185</sub> TiO <sub>2.963</sub>                     | 38.764            | 8.351                        | 2.029        | 1.481    | 9992.4/T                | 3018.9/T                  |

## References

- [1] Slack, G.A. Nonmetallic crystals with high thermal conductivity. *J. Phys. Chem. Solids*. **1973**, 34, 321-335. [https://doi.org/10.1016/0022-3697\(73\)90092-9](https://doi.org/10.1016/0022-3697(73)90092-9).
- [2] Chen, Q.; Zhang, P.; Qin, M.J.; Lou, Z.H.; Gong, L.Y.; Xu, J.; Kong, J.; Yan, H.X.; Gao, F. Effect of La<sup>3+</sup>, Ag<sup>+</sup> and Bi<sup>3+</sup> doping on thermoelectric properties of SrTiO<sub>3</sub>: First-principles investigation. *Ceram. Int.* **2022**, 48, 13803-13816. <https://doi.org/10.1016/j.ceramint.2022.01.262>.
- [3] Sun, J. F.; Singh, D. J. Thermoelectric properties of *n*-type SrTiO<sub>3</sub>. *APL Mater.* **2016**, 4, 104803. <https://doi.org/10.1063/1.4952610>.
- [4] Lu, Z.; Zhang, H.; Lei, W.; Sinclair, D.C.; Reaney, I.M. High-figure-of-merit thermoelectric La-doped A site-deficient SrTiO<sub>3</sub> ceramics. *Chem. Mater.* **2016**, 28, 925-935. <https://doi.org/10.1021/acs.chemmater.5b04616>.
- [5] Li, X.; Zhao, H.; Zhou, X.; Xu, N.; Xie, Z.; Chen, N. Electrical conductivity and structural stability of La-doped SrTiO<sub>3</sub> with A-site deficiency as anode materials for solid oxide fuel cells. *Int. J. Hydrogen. Energ.* **2010**, 35, 7913-7918. <https://doi.org/10.1016/j.ijhydene.2010.05.043>.
- [6] Zhang, P.; Gong, L.Y.; Lou, Z.H.; Xu, J.; Cao, S.Y.; Zhu, J.T.; Yan, H.X.; Gao, F. Reduced lattice thermal conductivity of perovskite-type high-entropy (Ca<sub>0.25</sub>Sr<sub>0.25</sub>Ba<sub>0.25</sub>RE<sub>0.25</sub>)TiO<sub>3</sub> ceramics by phonon engineering for thermoelectric applications. *J. Alloys Compd.* **2022**, 898, 162858. <https://doi.org/10.1016/j.jallcom.2021.162858>.

- [7] Qin, M.J.; Lou, Z.H.; Zhang, P.; Shi, Z.M.; Xu, J.; Chen, Y.; Gao, F. Enhancement of thermoelectric performance of  $\text{Sr}_{0.9}\text{La}_{0.1}\text{TiO}_3$ -based ceramics regulated by nanostructures. *ACS Appl. Mater. Inter.* **2020**, *12*, 53899-53909. 10.1021/acsami.0c13693.
- [8] Muta, H.; Kurosaki, K.; Yamanaka, S. Thermoelectric properties of reduced and La-doped single-crystalline  $\text{SrTiO}_3$ . *J. Alloys Compd.* **2005**, *392*, 306-309. <https://doi.org/10.1016/j.jallcom.2004.09.005>.
- [9] Ohta, S.; Nomura, T.; Ohta, H.; Koumoto, K. High-temperature carrier transport and thermoelectric properties of heavily La- or Nb-doped  $\text{SrTiO}_3$  single crystals. *J. Appl. Phys.* **2005**, *97*, 034106. <https://doi.org/10.1063/1.1847723>.
- [10] Park, K.; Son, Jae S.; Woo, S.I.; Shin, K.; Oh, M.W.; Park, S.D.; Hyeon, T. Colloidal synthesis and thermoelectric properties of La-doped  $\text{SrTiO}_3$  nanoparticles. *J. Mater.* **2014**, *2*, 4217-4224. 10.1039/c3ta14699e.
- [11] Wang, J.; Zhang, B.Y.; Kang, H.J.; Li, Y.; Yaer, X.; Li, J.F.; Tan, Q.; Zhang, S.; Fan, G.H.; Liu, C.Y.; Miao, L.; Nan, D.; Wang, T.M.; Zhao, L.D. Record high thermoelectric performance in bulk  $\text{SrTiO}_3$  via nano-scale modulation doping. *Nano Energy*. **2017**, *35*: 387-395. <https://doi.org/10.1016/j.nanoen.2017.04.003>.
